# Supplementary material for: Aromatic identity, electronic substitution, and sequence in amphiphilic tripeptide self-assembly
Source: Royal Society of Chemistry journal article supplement (doi:10.1039/c8sm01994k), 2018-01-01
Supplement: c8sm01994k1.pdf [file c8sm01994k1.pdf]

***Electronic Supporting Information***

**Aromatic Identity, Electronic Substitution, and Sequence in  
Amphiphilic Tripeptide Self-Assembly**

Jugal Kishore Sahoo<sup>1</sup>, Calvin Nazareth<sup>1</sup>, Michael A. VandenBerg<sup>1</sup>, Matthew J. Webber<sup>\*1, 2, 3, 4, 5, 6</sup>

1. Department of Chemical and Biomolecular Engineering, University of Notre Dame, Notre Dame, IN 46556, USA
2. Department of Chemistry and Biochemistry, University of Notre Dame, Notre Dame, IN 46556, USA
3. Harper Cancer Research Institute, University of Notre Dame, Notre Dame, IN 46556, USA
4. Advanced Diagnostics and Therapeutics, University of Notre Dame, Notre Dame, IN 46556, USA
5. Warren Family Center for Drug Discovery and Development, University of Notre Dame, Notre Dame, IN 46556, USA
6. Center for Nanoscience and Technology (NDnano), University of Notre Dame, Notre Dame, IN 46556, USA

Correspondence should be addressed to  
Prof. Matthew. J. Webber  
Department of Chemical and Biomolecular Engineering  
University of Notre Dame  
205B McCourtney Hall  
Notre Dame, IN, 46556 USA  
E-Mail: [mwebber@nd.edu](mailto:mwebber@nd.edu)

## **Contents**

1. Chemical Characterisation of Tripeptides ( $^1\text{H}$  NMR, Mass Spec, and HPLC)
2. Additional Supporting Data
3. References

## 1. Chemical Characterisation of Tripeptides

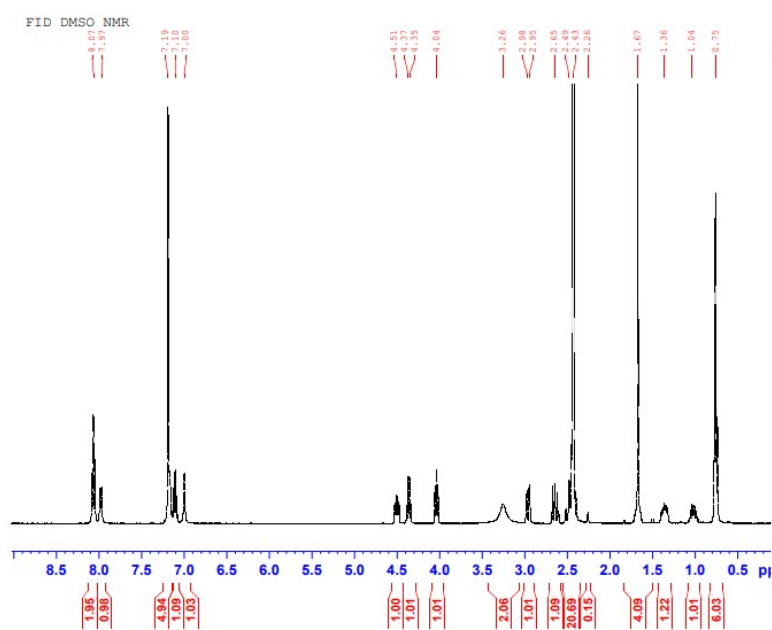

Figure S1: <sup>1</sup>H NMR spectrum of Ac-FID-NH<sub>2</sub>

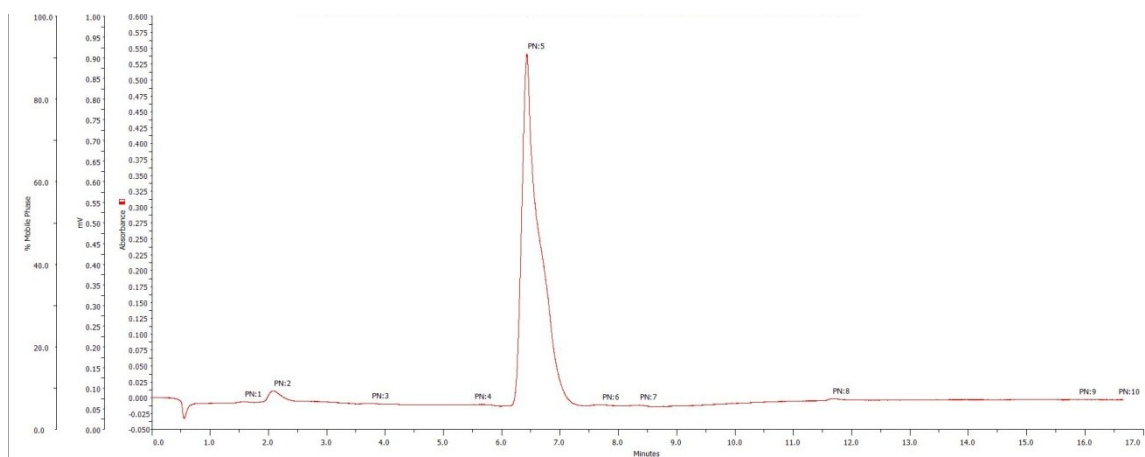

Figure S2: Analytical HPLC chromatogram of Ac-FID-NH<sub>2</sub>

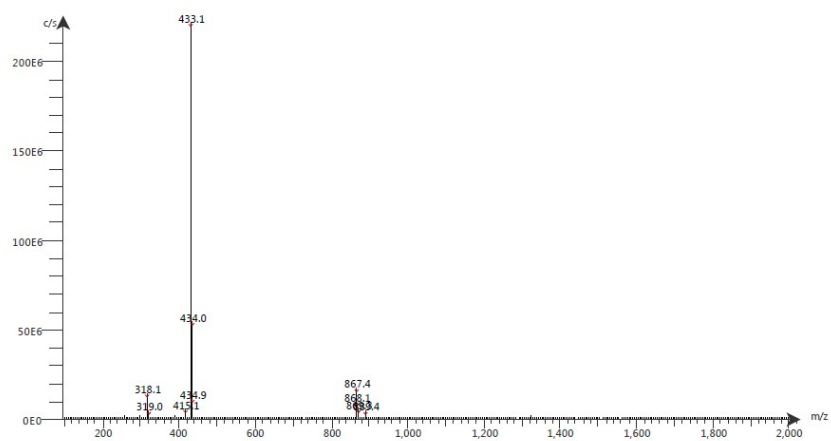

**Figure S3:** Mass spectroscopy of Ac-FID-NH<sub>2</sub>

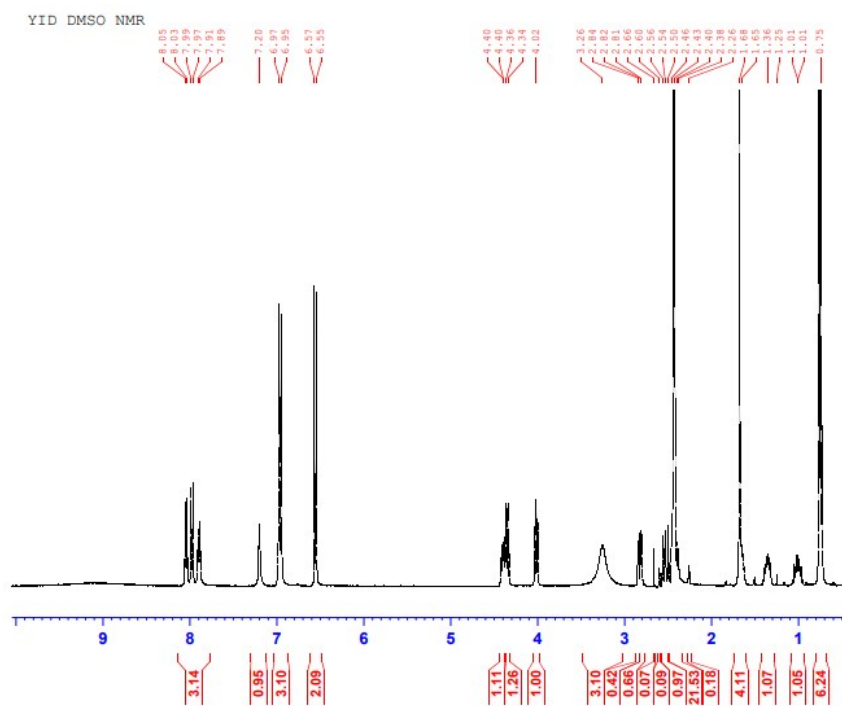

**Figure S4:** <sup>1</sup>H NMR spectrum of Ac-YID-NH<sub>2</sub>

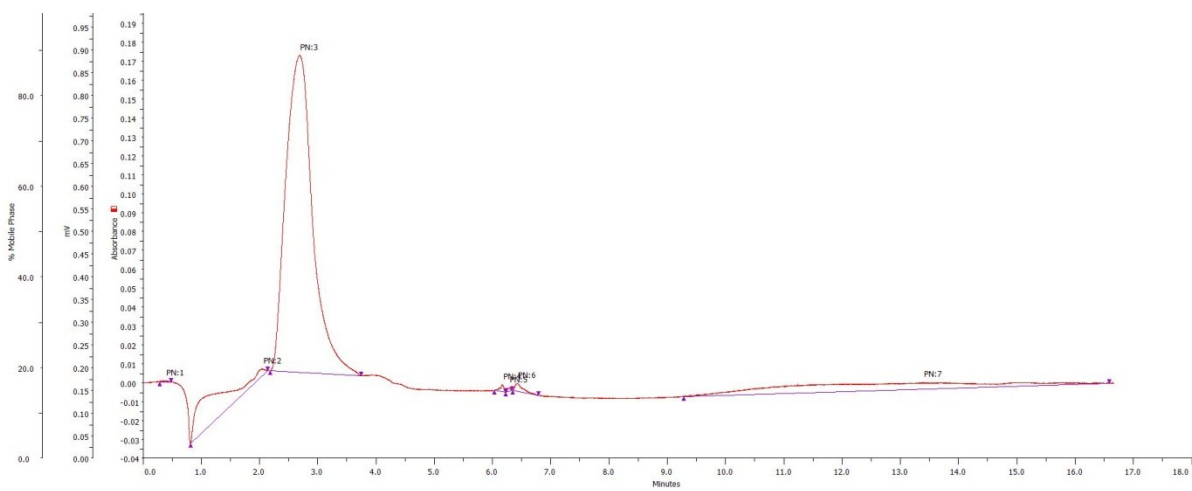

**Figure S5:** Analytical HPLC chromatogram of Ac-YID-NH<sub>2</sub>

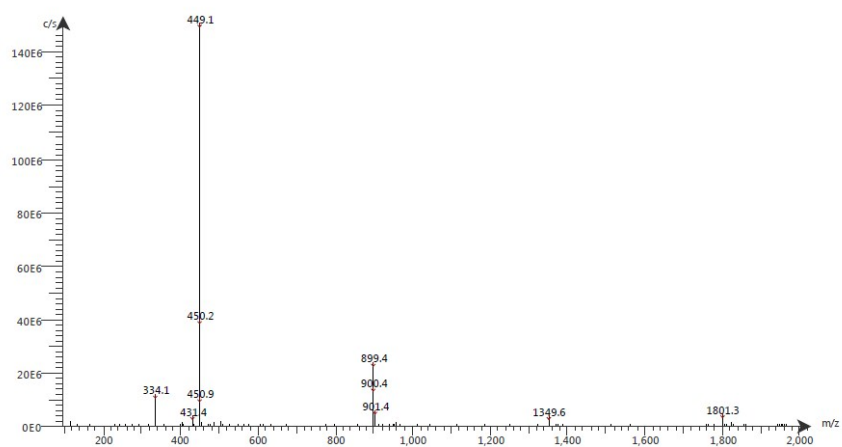

**Figure S6:** Mass spectroscopy of Ac-YID-NH<sub>2</sub>

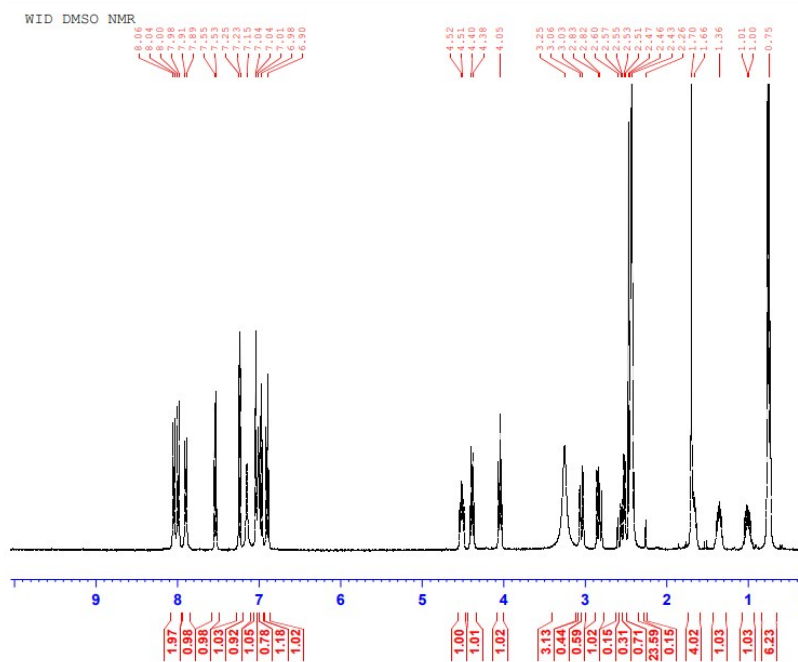

**Figure S7:**  $^1\text{H}$  NMR spectrum of Ac-WID-NH<sub>2</sub>

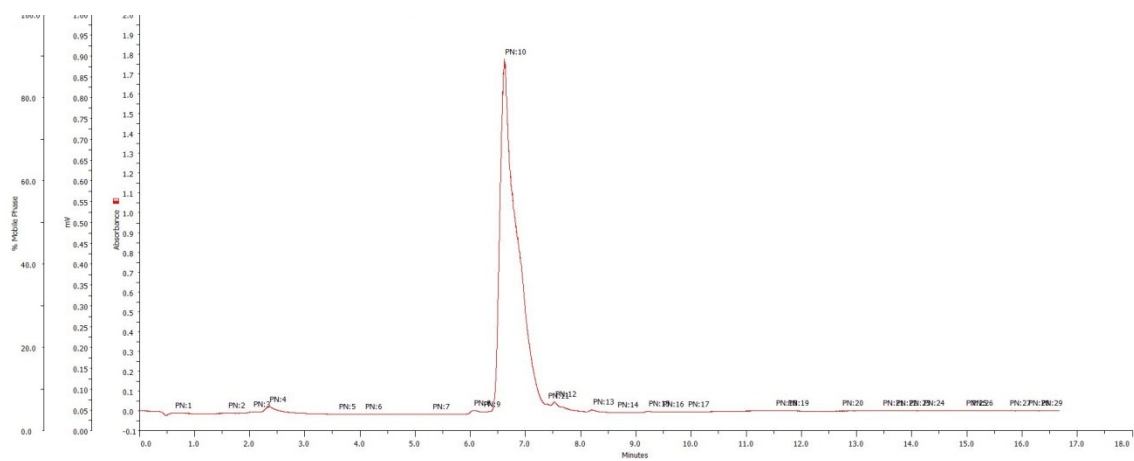

**Figure S8:** Analytical HPLC chromatogram of Ac-WID-NH<sub>2</sub>

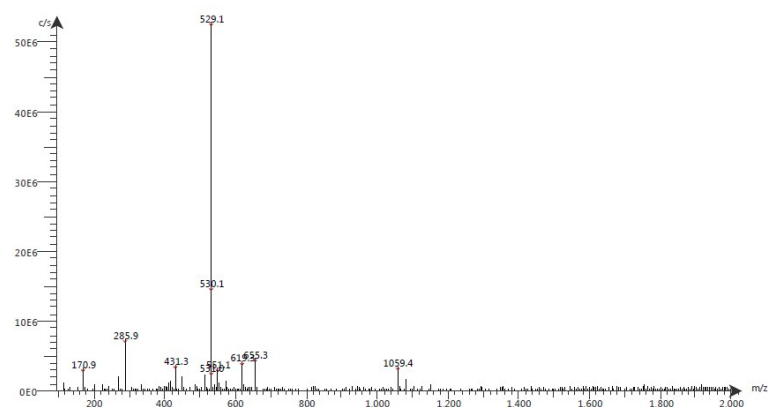

**Figure S9:** Mass spectroscopy of Ac-WID-NH<sub>2</sub>

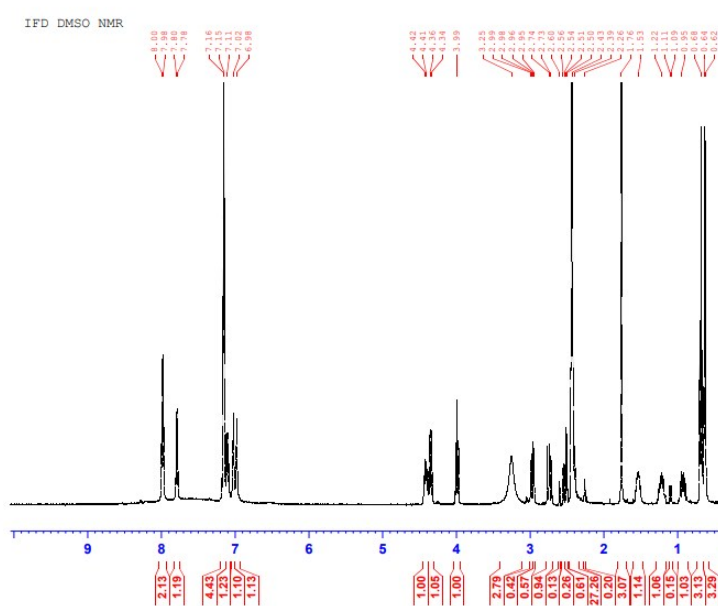

**Figure S10:** <sup>1</sup>H NMR spectrum of Ac-IFD-NH<sub>2</sub>

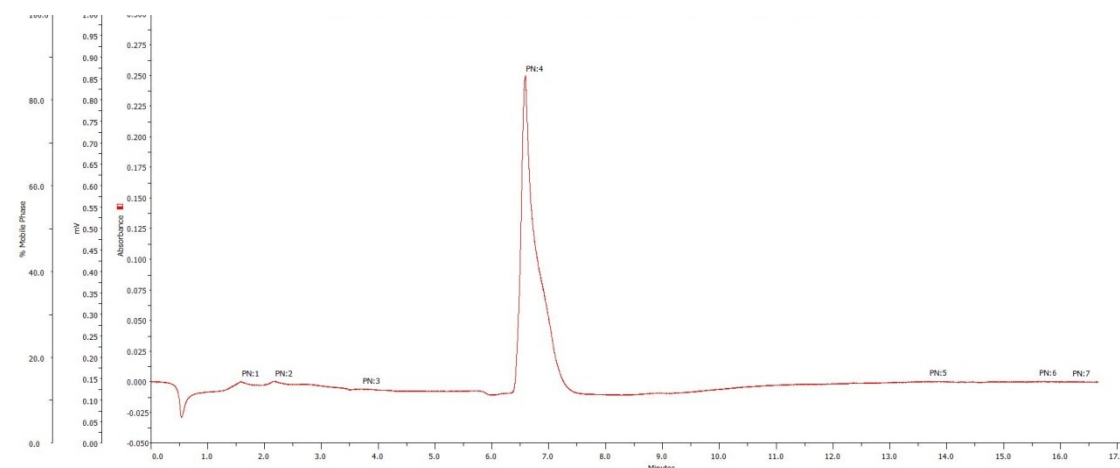

**Figure S11:** Analytical HPLC chromatogram of Ac-IFD-NH<sub>2</sub>

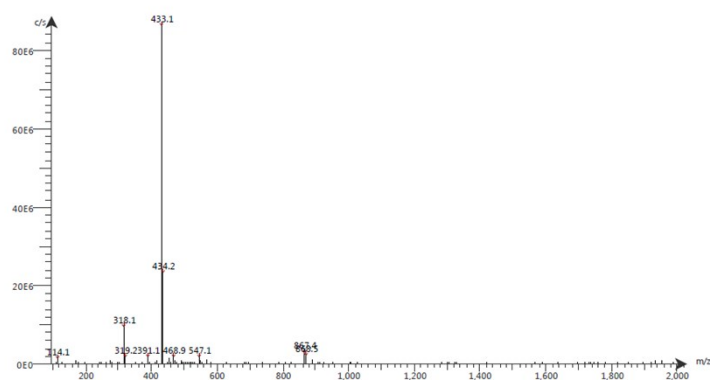

**Figure S12:** Mass spectroscopy of Ac-IFD-NH<sub>2</sub>



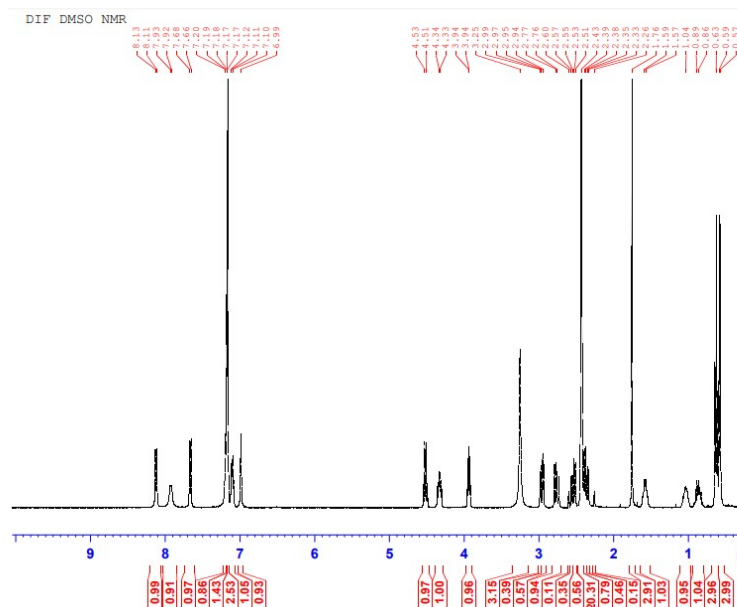

**Figure S13:**  $^1\text{H}$  NMR spectrum of Ac-DIF-NH<sub>2</sub>

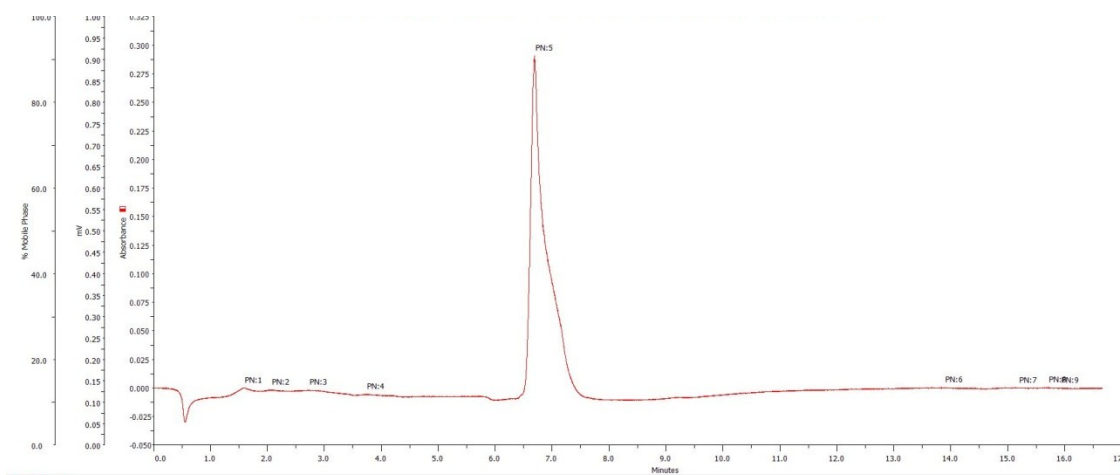

**Figure S14:** Analytical HPLC of Ac-DIF-NH<sub>2</sub>

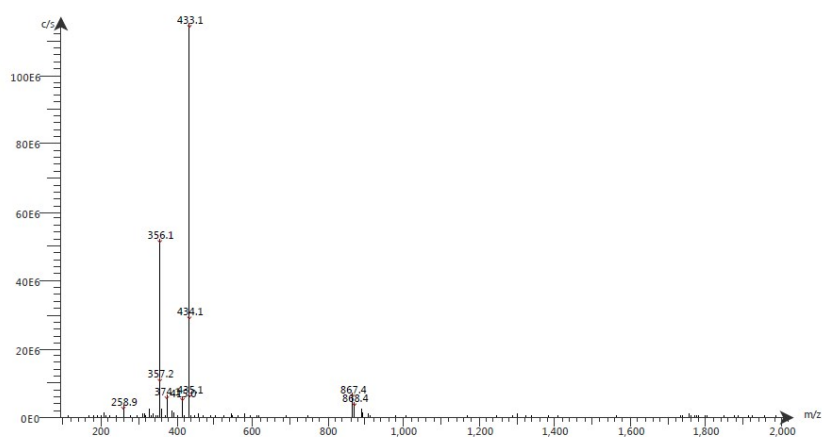

**Figure S15:** Mass spectroscopy of Ac-DIF-NH<sub>2</sub>

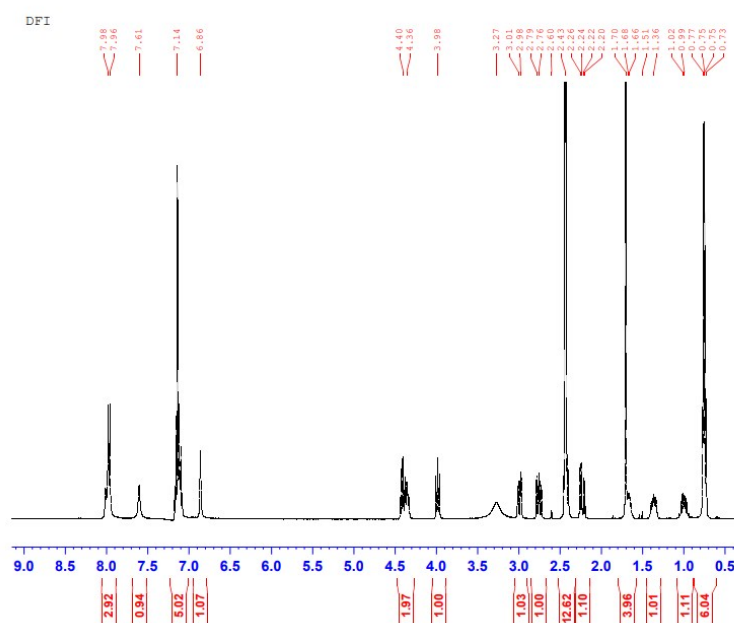

**Figure S16:** <sup>1</sup>H NMR spectroscopy of Ac-DFI-NH<sub>2</sub>

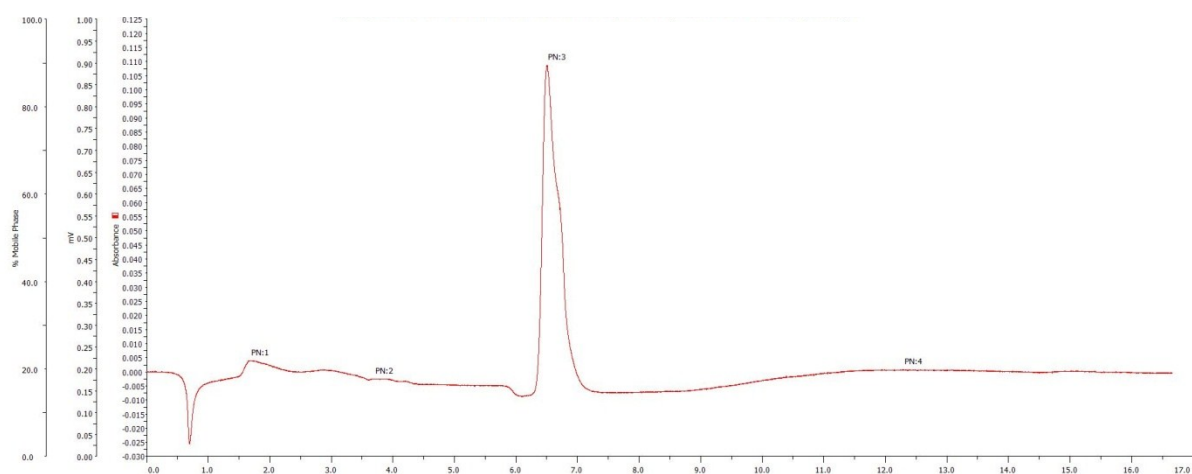

**Figure S17:** Analytical HPLC of Ac-DFI-NH<sub>2</sub>

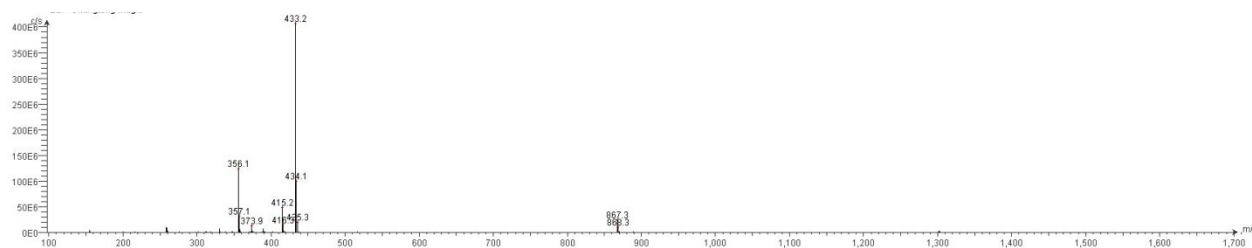

**Figure S18:** Mass spectroscopy of Ac-DFI-NH<sub>2</sub>

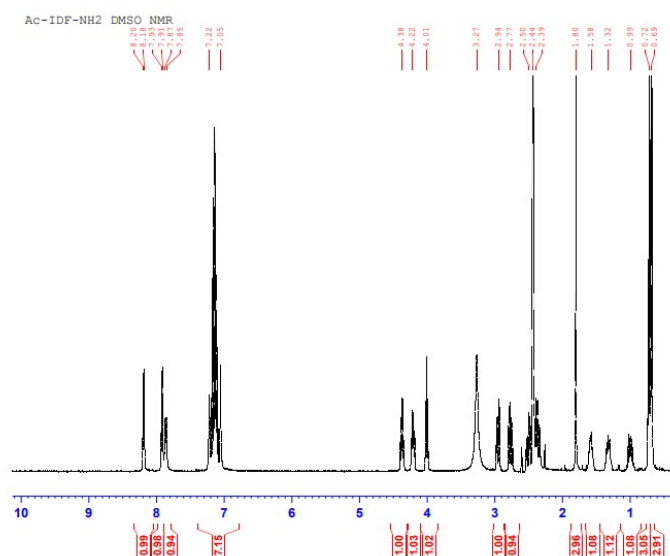

**Figure S19:** <sup>1</sup>H NMR spectrum of Ac-IDF-NH<sub>2</sub>

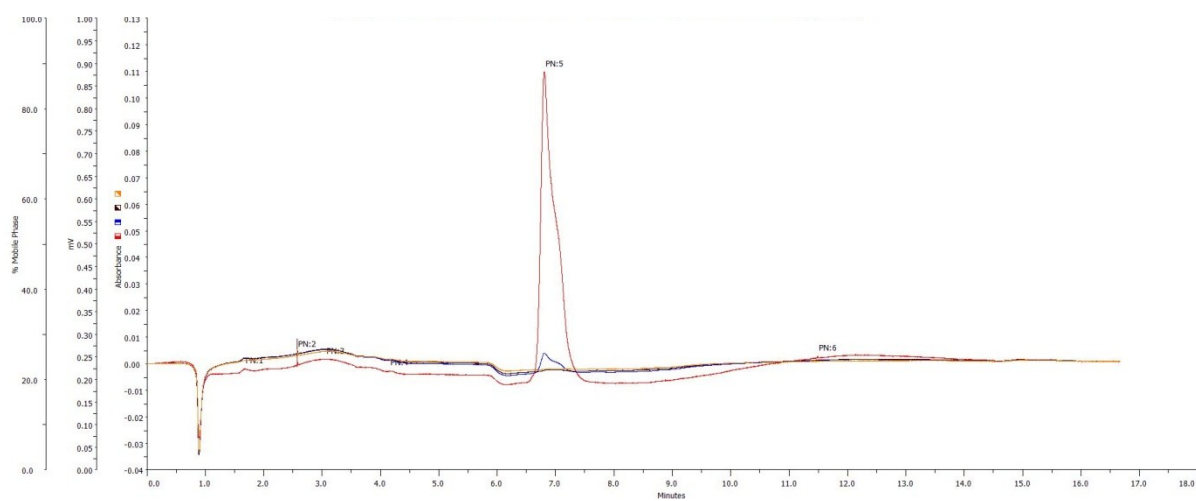

**Figure S20:** Analytical HPLC of Ac-IDF-NH<sub>2</sub>

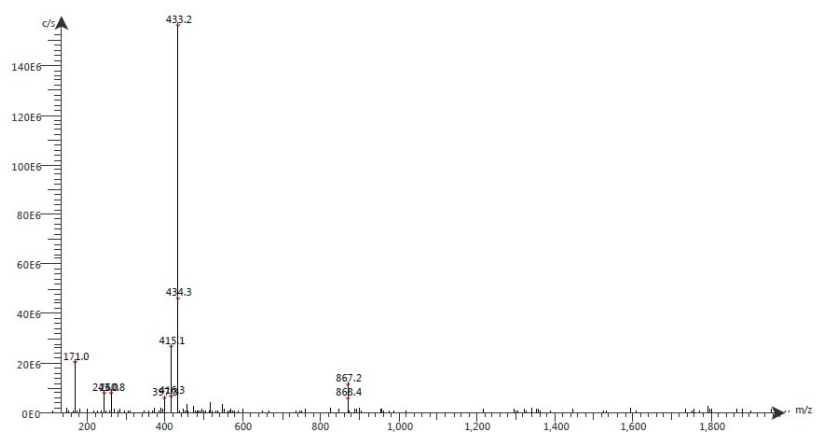

**Figure S21:** Mass spectroscopy of Ac-IDF-NH<sub>2</sub>

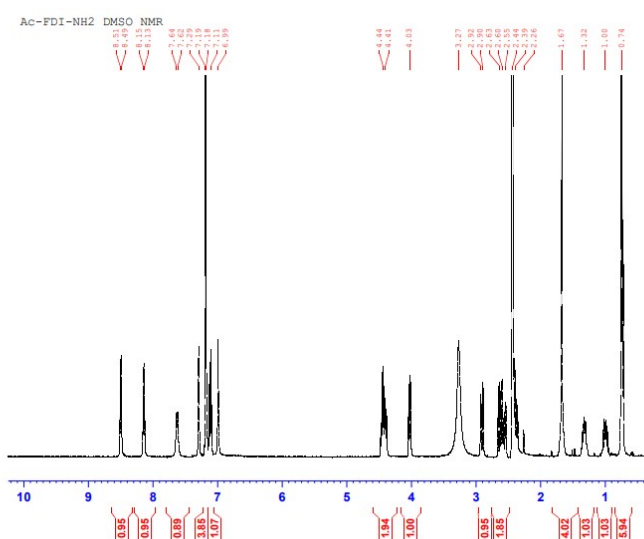

**Figure S22:** <sup>1</sup>H NMR spectrum of Ac-FDI-NH<sub>2</sub>

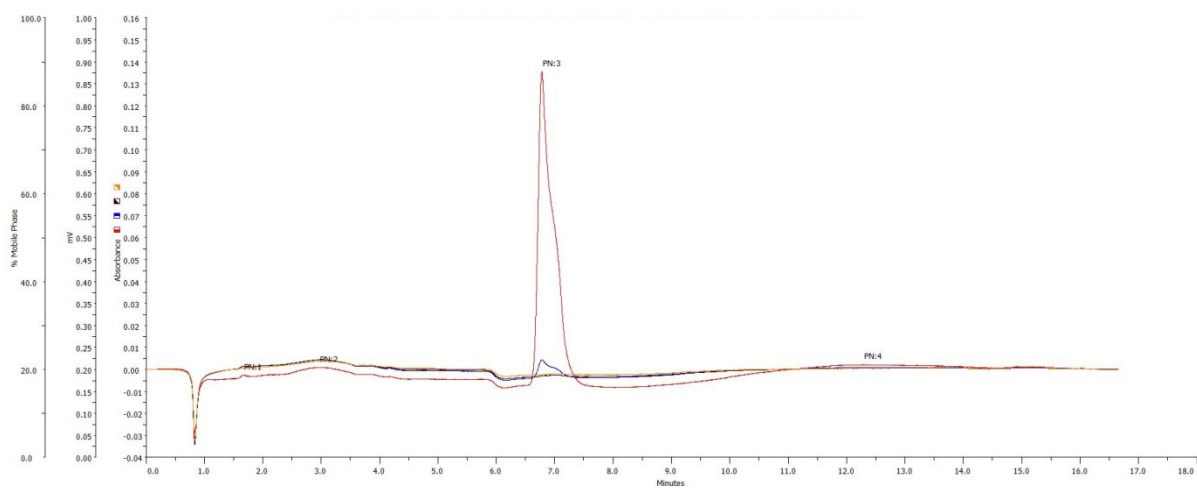

**Figure S23:** Analytical HPLC of Ac-FDI-NH<sub>2</sub>

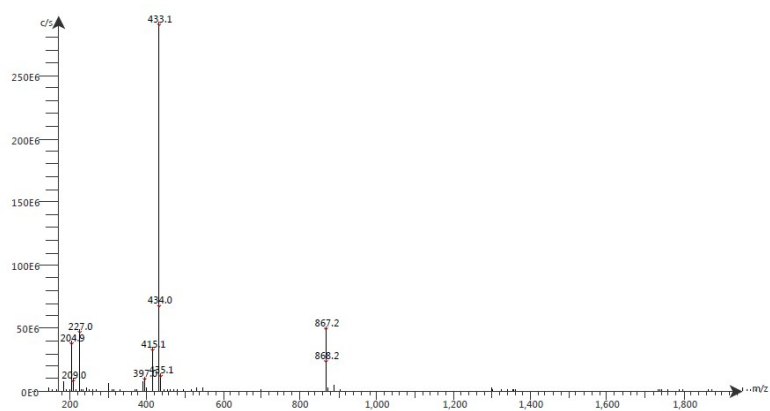

**Figure S24:** Mass spectroscopy of Ac-FDI-NH<sub>2</sub>

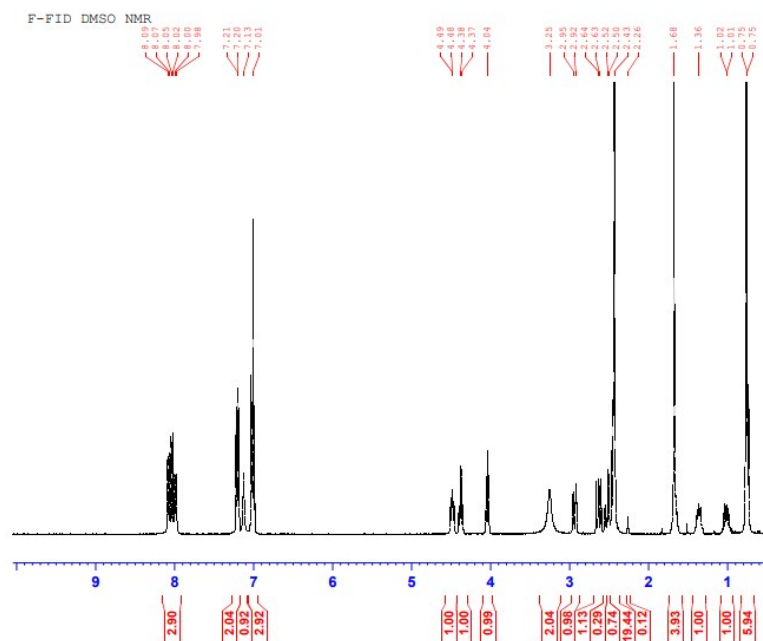

**Figure S25:**  $^1\text{H}$  NMR spectrum of  $\text{Ac-F}_\text{FID}\text{-NH}_2$

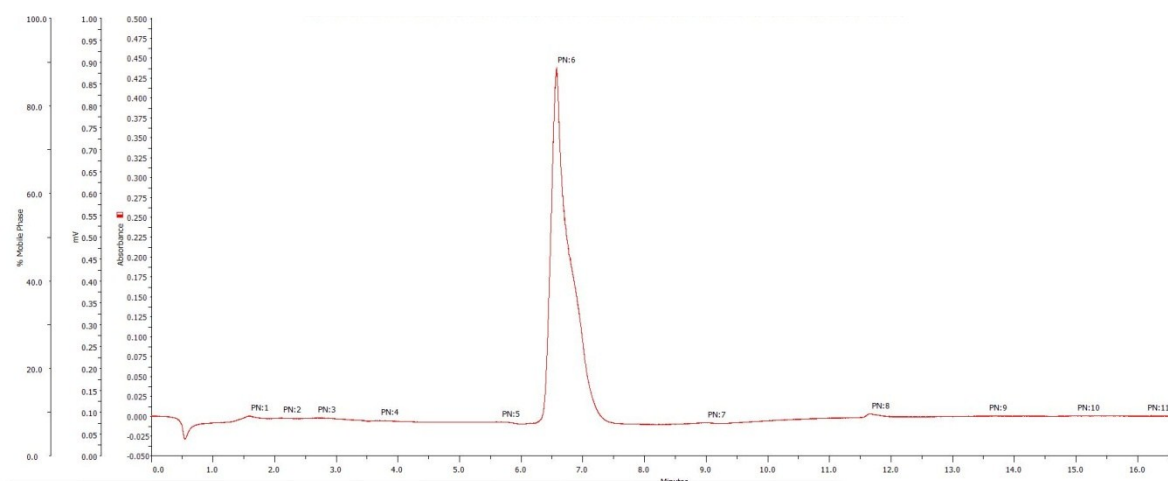

**Figure S26:** Analytical HPLC of  $\text{Ac-F}_\text{FID}\text{-NH}_2$

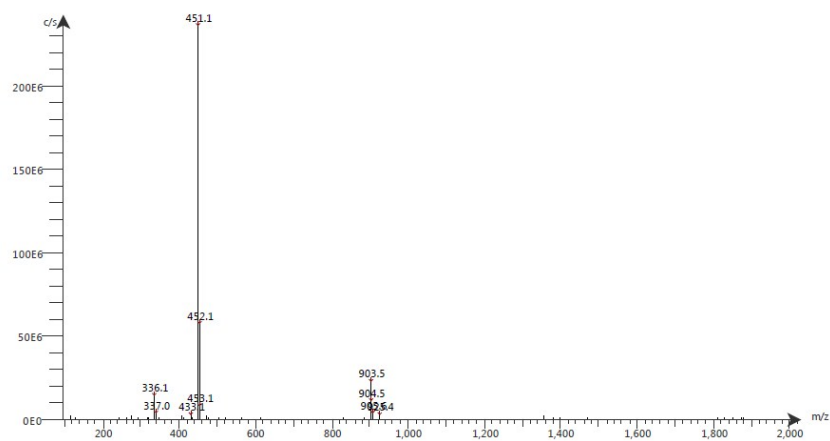

**Figure S27:** Mass spectroscopy of Ac-F<sub>1</sub>ID-NH<sub>2</sub>

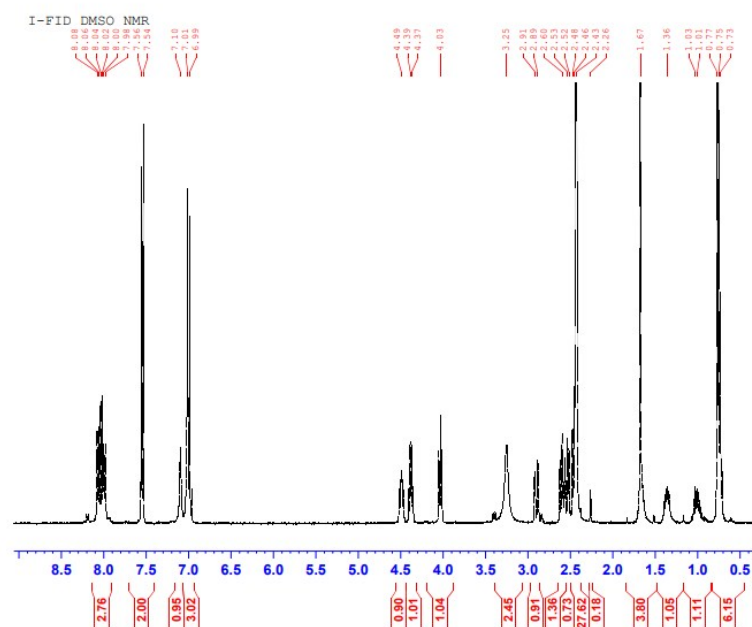

**Figure S28:** <sup>1</sup>H NMR spectrum of Ac-F<sub>1</sub>ID-NH<sub>2</sub>



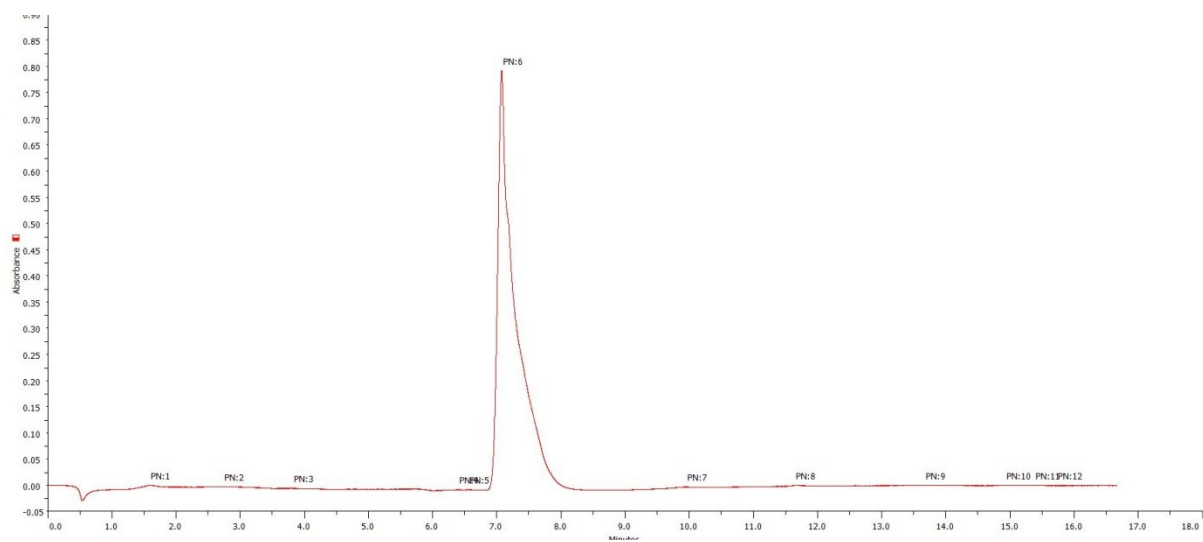

**Figure S29:** Analytical HPLC of Ac-F<sub>1</sub>ID-NH<sub>2</sub>

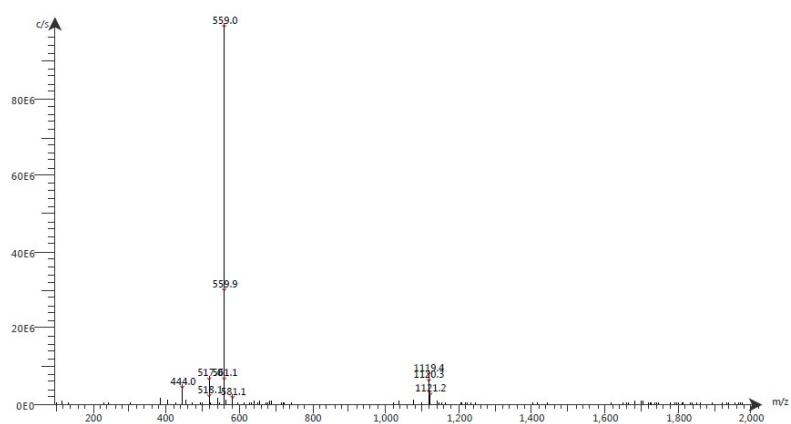

**Figure S30:** Mass spectroscopy of Ac-F<sub>1</sub>ID-NH<sub>2</sub>

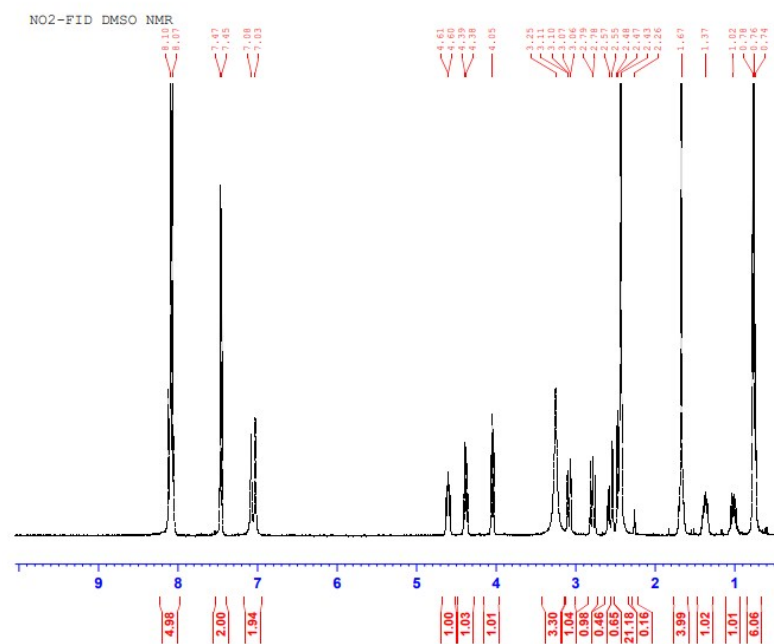

**Figure S31:** <sup>1</sup>H NMR spectrum of Ac-F<sub>NO<sub>2</sub></sub>ID-NH<sub>2</sub>

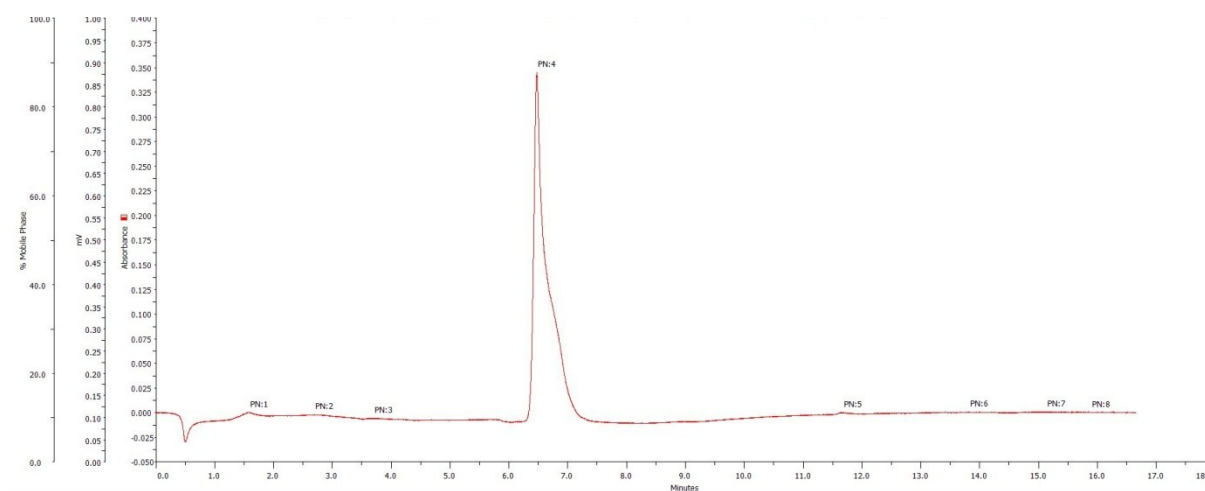

**Figure S32:** Analytical HPLC of Ac-F<sub>NO<sub>2</sub></sub>ID-NH<sub>2</sub>

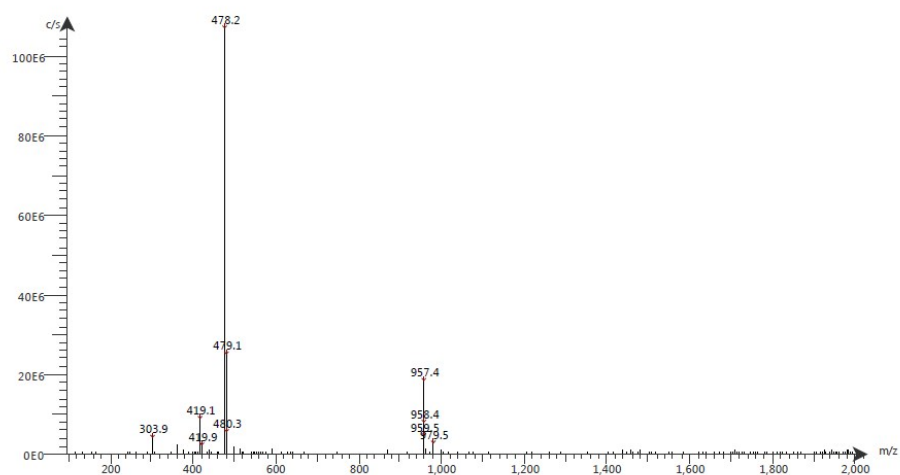

**Figure S33:** Mass spectroscopy of Ac-F<sub>NO2</sub>ID-NH<sub>2</sub>

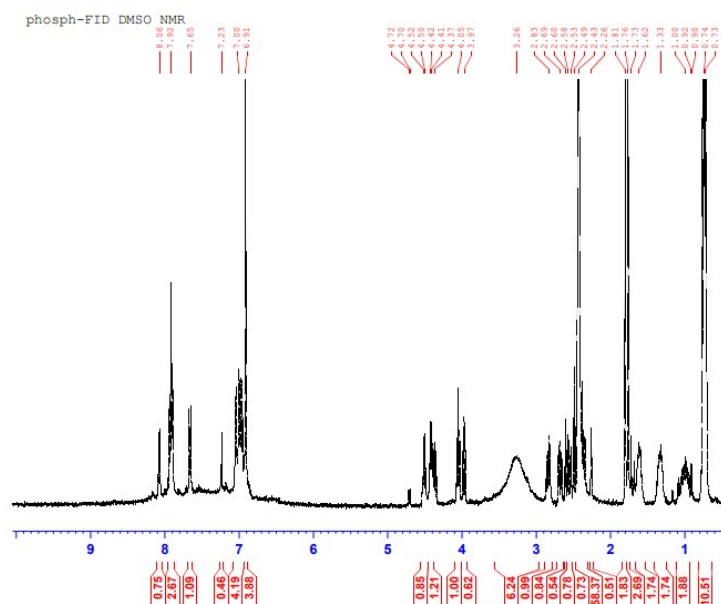

**Figure S34:** <sup>1</sup>H NMR spectrum of Ac-F<sub>PO4</sub>ID-NH<sub>2</sub>

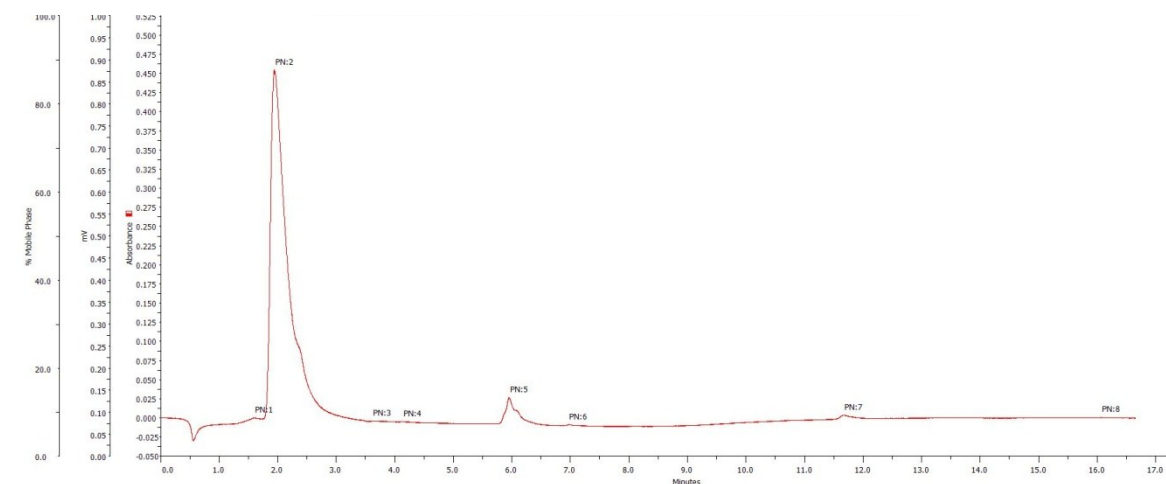

**Figure S35:** Analytical HPLC of Ac-F<sub>PO4</sub>ID-NH<sub>2</sub>

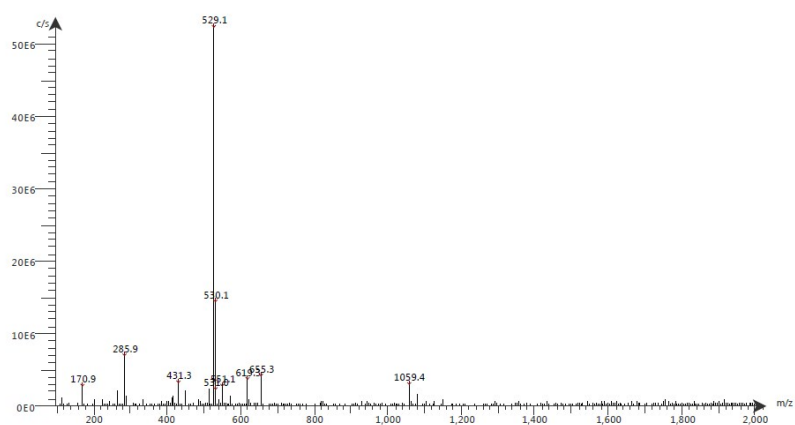

**Figure S36:** Mass spectroscopy of Ac-F<sub>PO4</sub>ID-NH<sub>2</sub>

## 2. Additional Supporting Data

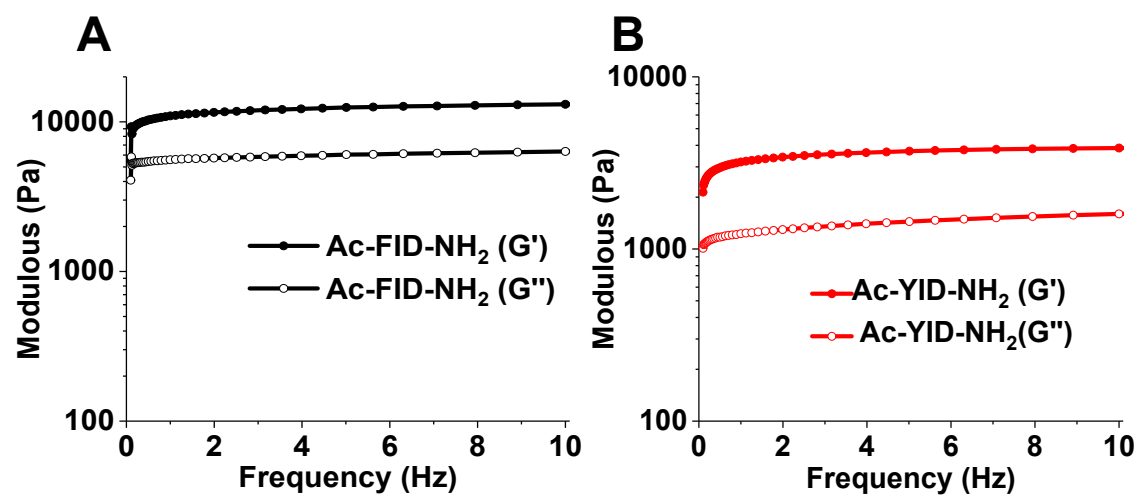

**Figure S37:** A, B) Oscillating rheology frequency sweep of FID and YID respectively.

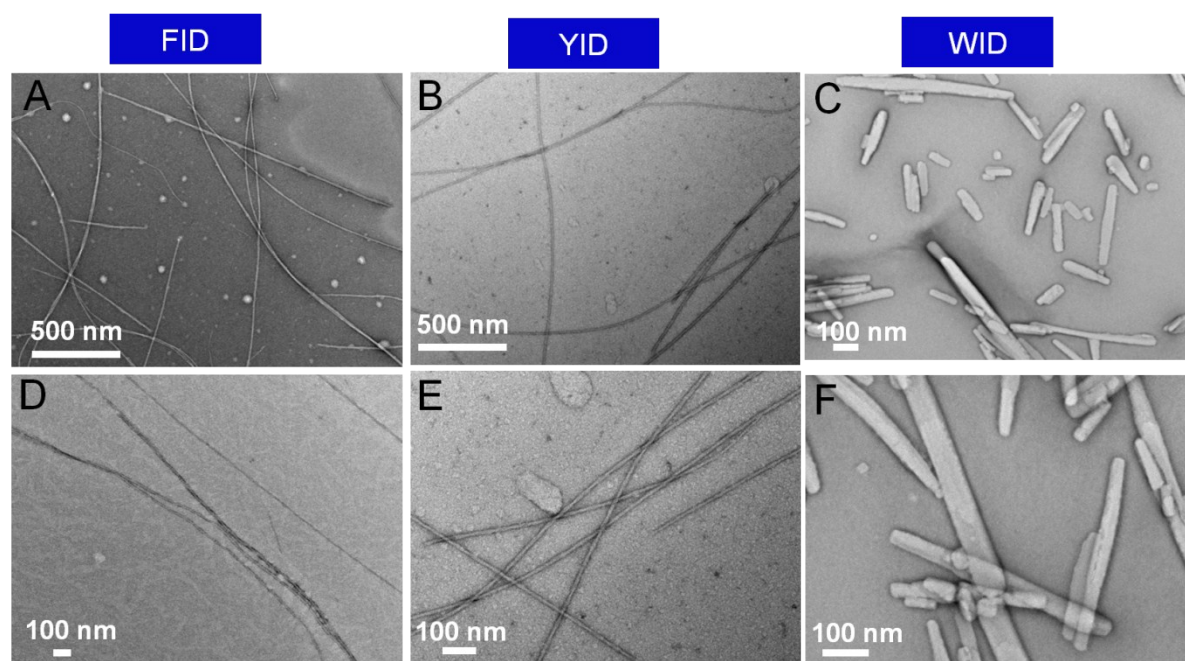

**Figure S38:** Additional TEM images of the tripeptides: A and D) FID; B and E) YID; C and F) WID.

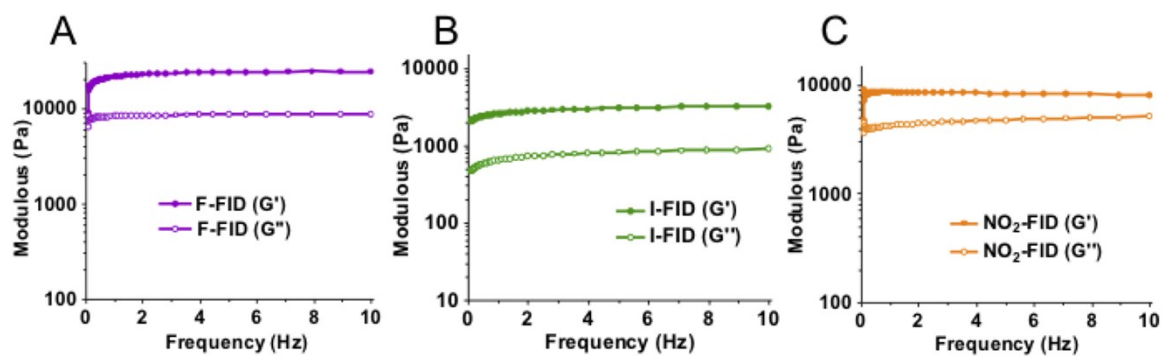

**Figure S39:** A, B, C) Oscillating rheology frequency sweep of  $F_{\text{FID}}$ ,  $F_{\text{IID}}$  and  $F_{\text{NO}_2\text{ID}}$  respectively.

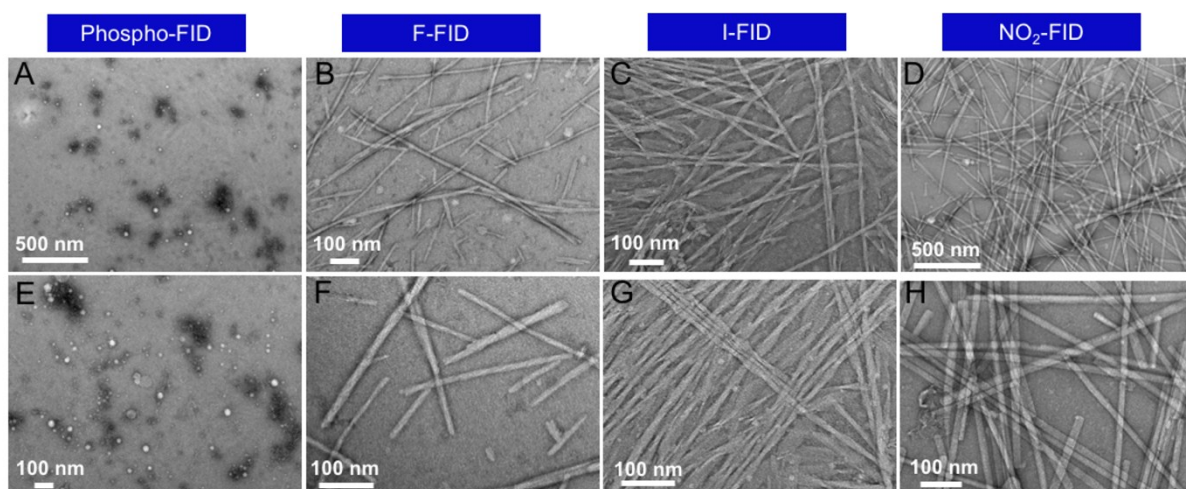

**Figure S40:** Additional TEM images of the tripeptides at different magnifications: A and E)  $F_{\text{PO}_4\text{ID}}$ ; B and F)  $F_{\text{FID}}$ ; C and G)  $F_{\text{IID}}$ ; D and H)  $F_{\text{NO}_2\text{ID}}$ .

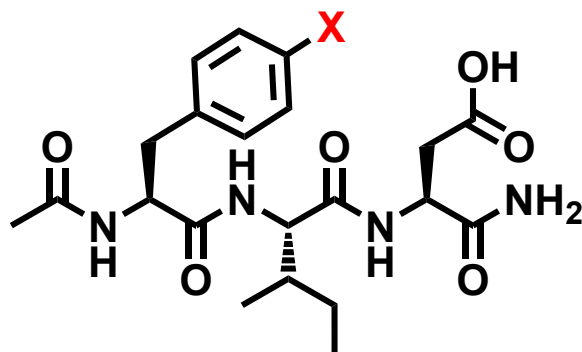

| Substitution (X)                 | Hammett Values |
|----------------------------------|----------------|
| -OH                              | -0.37          |
| -OPO <sub>3</sub> H <sub>2</sub> | 0.00           |
| -H                               | 0.00           |
| -F                               | 0.06           |
| -I                               | 0.18           |
| -NO <sub>2</sub>                 | 0.78           |

**Table S1:** Substitution groups and their corresponding Hammett  $\sigma_p$  Values (From Ref S1)

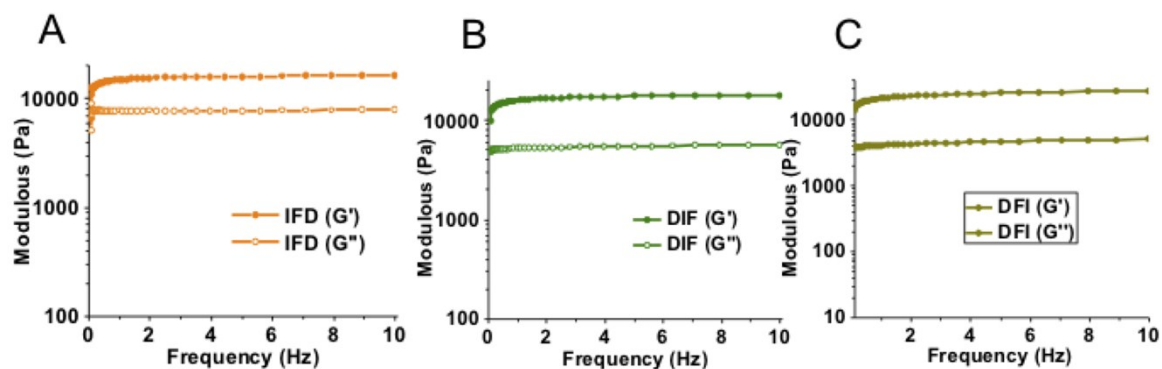

**Figure S41:** A, B, C) oscillating rheology frequency sweep of IFD, DIF and DFI respectively.

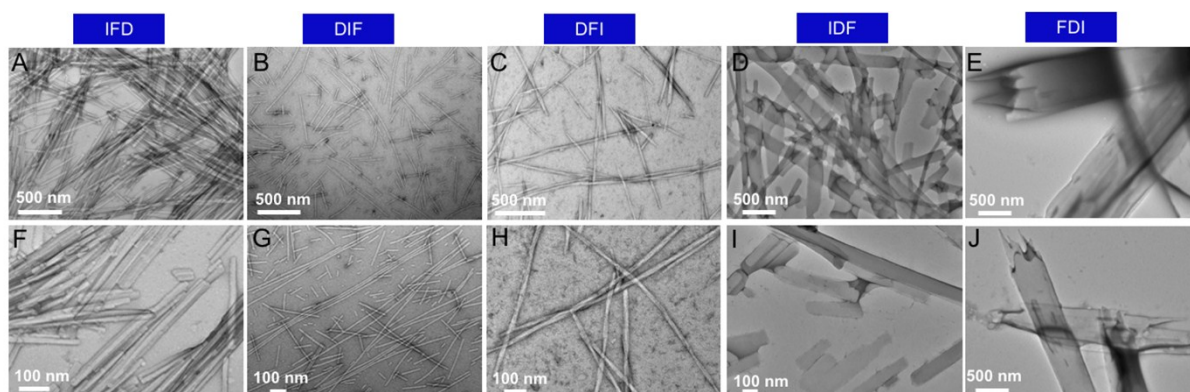

**Figure S42:** Additional TEM images of the tripeptides at different magnifications: A and F) IFD; B and G) DIF; C and H) FDI; D and I) IDF; E and J) FDI.

#### 4. References:

- S1. C. Hansch, A. Leo and R. W. Taft, *Chem. Rev.*, 1991, **91**, 165–195.
